# Supplementary material
Source: Research Square preprint supplement (doi:10.21203/rs.3.rs-9328816/v1)

|  |  |  |  |  |  |
| --- | --- | --- | --- | --- | --- |
| League | n | Mean Control | Mean Injured season | MD | SD Difference |
| Liga F | 40 | 454.55 | 507.425 | 52.875 | 290.2555 |
| English Women's Super League | 36 | 427.6111 | 512.4444 | 84.83333 | 349.528 |
| Frauen Bundesliga | 33 | 412.5152 | 431.5758 | 19.06061 | 313.3306 |
| NWSL | 27 | 411.7037 | 441.8889 | 30.18519 | 302.0978 |
| Serie A | 27 | 470.037 | 481.8519 | 11.81481 | 374.1502 |
| Arkema Première Ligue | 22 | 530.5455 | 493.4091 | -37.1364 | 342.6448 |
| Scottish Women’s Premier League | 19 | 396.7368 | 488.1579 | 91.42105 | 346.6257 |
| Liga MX | 19 | 480.7368 | 534.9474 | 54.21053 | 251.5306 |
| WE League | 16 | 247.0625 | 425.4375 | 178.375 | 263.4018 |
| Toppserien | 16 | 367.1875 | 471.5625 | 104.375 | 398.7089 |
| Liga BPI | 15 | 382.6667 | 614.6667 | 232 | 384.493 |
| Brasileirão Feminino | 15 | 335.9333 | 432.3333 | 96.4 | 320.0462 |
| ÖFB Frauen Bundesliga | 13 | 282.3846 | 419.8462 | 137.4615 | 195.0067 |
| A-League Women | 13 | 313.1538 | 445 | 131.8462 | 243.3392 |
| Swiss Women's Super League | 11 | 155 | 314.5455 | 159.5455 | 230.1345 |
| Eredivisie Vrouwen | 8 | 466 | 395.125 | -70.875 | 199.8581 |
| Damallsvenskan | 6 | 238 | 608.5 | 370.5 | 256.684 |
| A-Liga | 5 | 237.8 | 376 | 138.2 | 187.0433 |
| Belgian Women's Super League | 5 | 435.2 | 549.6 | 114.4 | 350.3474 |
| Campeonato de Fútbol Femenino | 4 | 226.5 | 264 | 37.5 | 325.1477 |
| Ekstraliga | 4 | 358.25 | 393 | 34.75 | 417.143 |
| Kadın Futbol Süper Ligi | 4 | 401.5 | 363.5 | -38 | 432.4658 |
| Ireland Women's Premier Division | 3 | 364.3333 | 387 | 22.66667 | 331.8574 |
| English Women's Super League 2 | 3 | 735.3333 | 623.6667 | -111.667 | 620.5001 |
| Liga Femenina Profesional de Fútbol Colombiano | 2 | 523.5 | 858.5 | 335 | 432.7494 |
| National Women's League | 1 | 4 | 177 | 173 | NA |
| Kansallinen Liiga | 1 | 1061 | 1104 | 43 | NA |
| Seconde Ligue | 1 | 630 | 457 | -173 | NA |
| Liga Promerica | 1 | 493 | 269 | -224 | NA |
| Saudi Women's Premier League | 1 | 234 | 0 | -234 | NA |
| Cypriot First Division | 1 | 600 | 310 | -290 | NA |
| Adran Premier | 1 | 887 | 573 | -314 | NA |
| Besta deild kvenna | 1 | 604 | 286 | -318 | NA |
| WK League | 1 | 360 | 0 | -360 | NA |
| Total | 375 | 402.8773 | 470.4773 | 67.6 | 319.3194 |


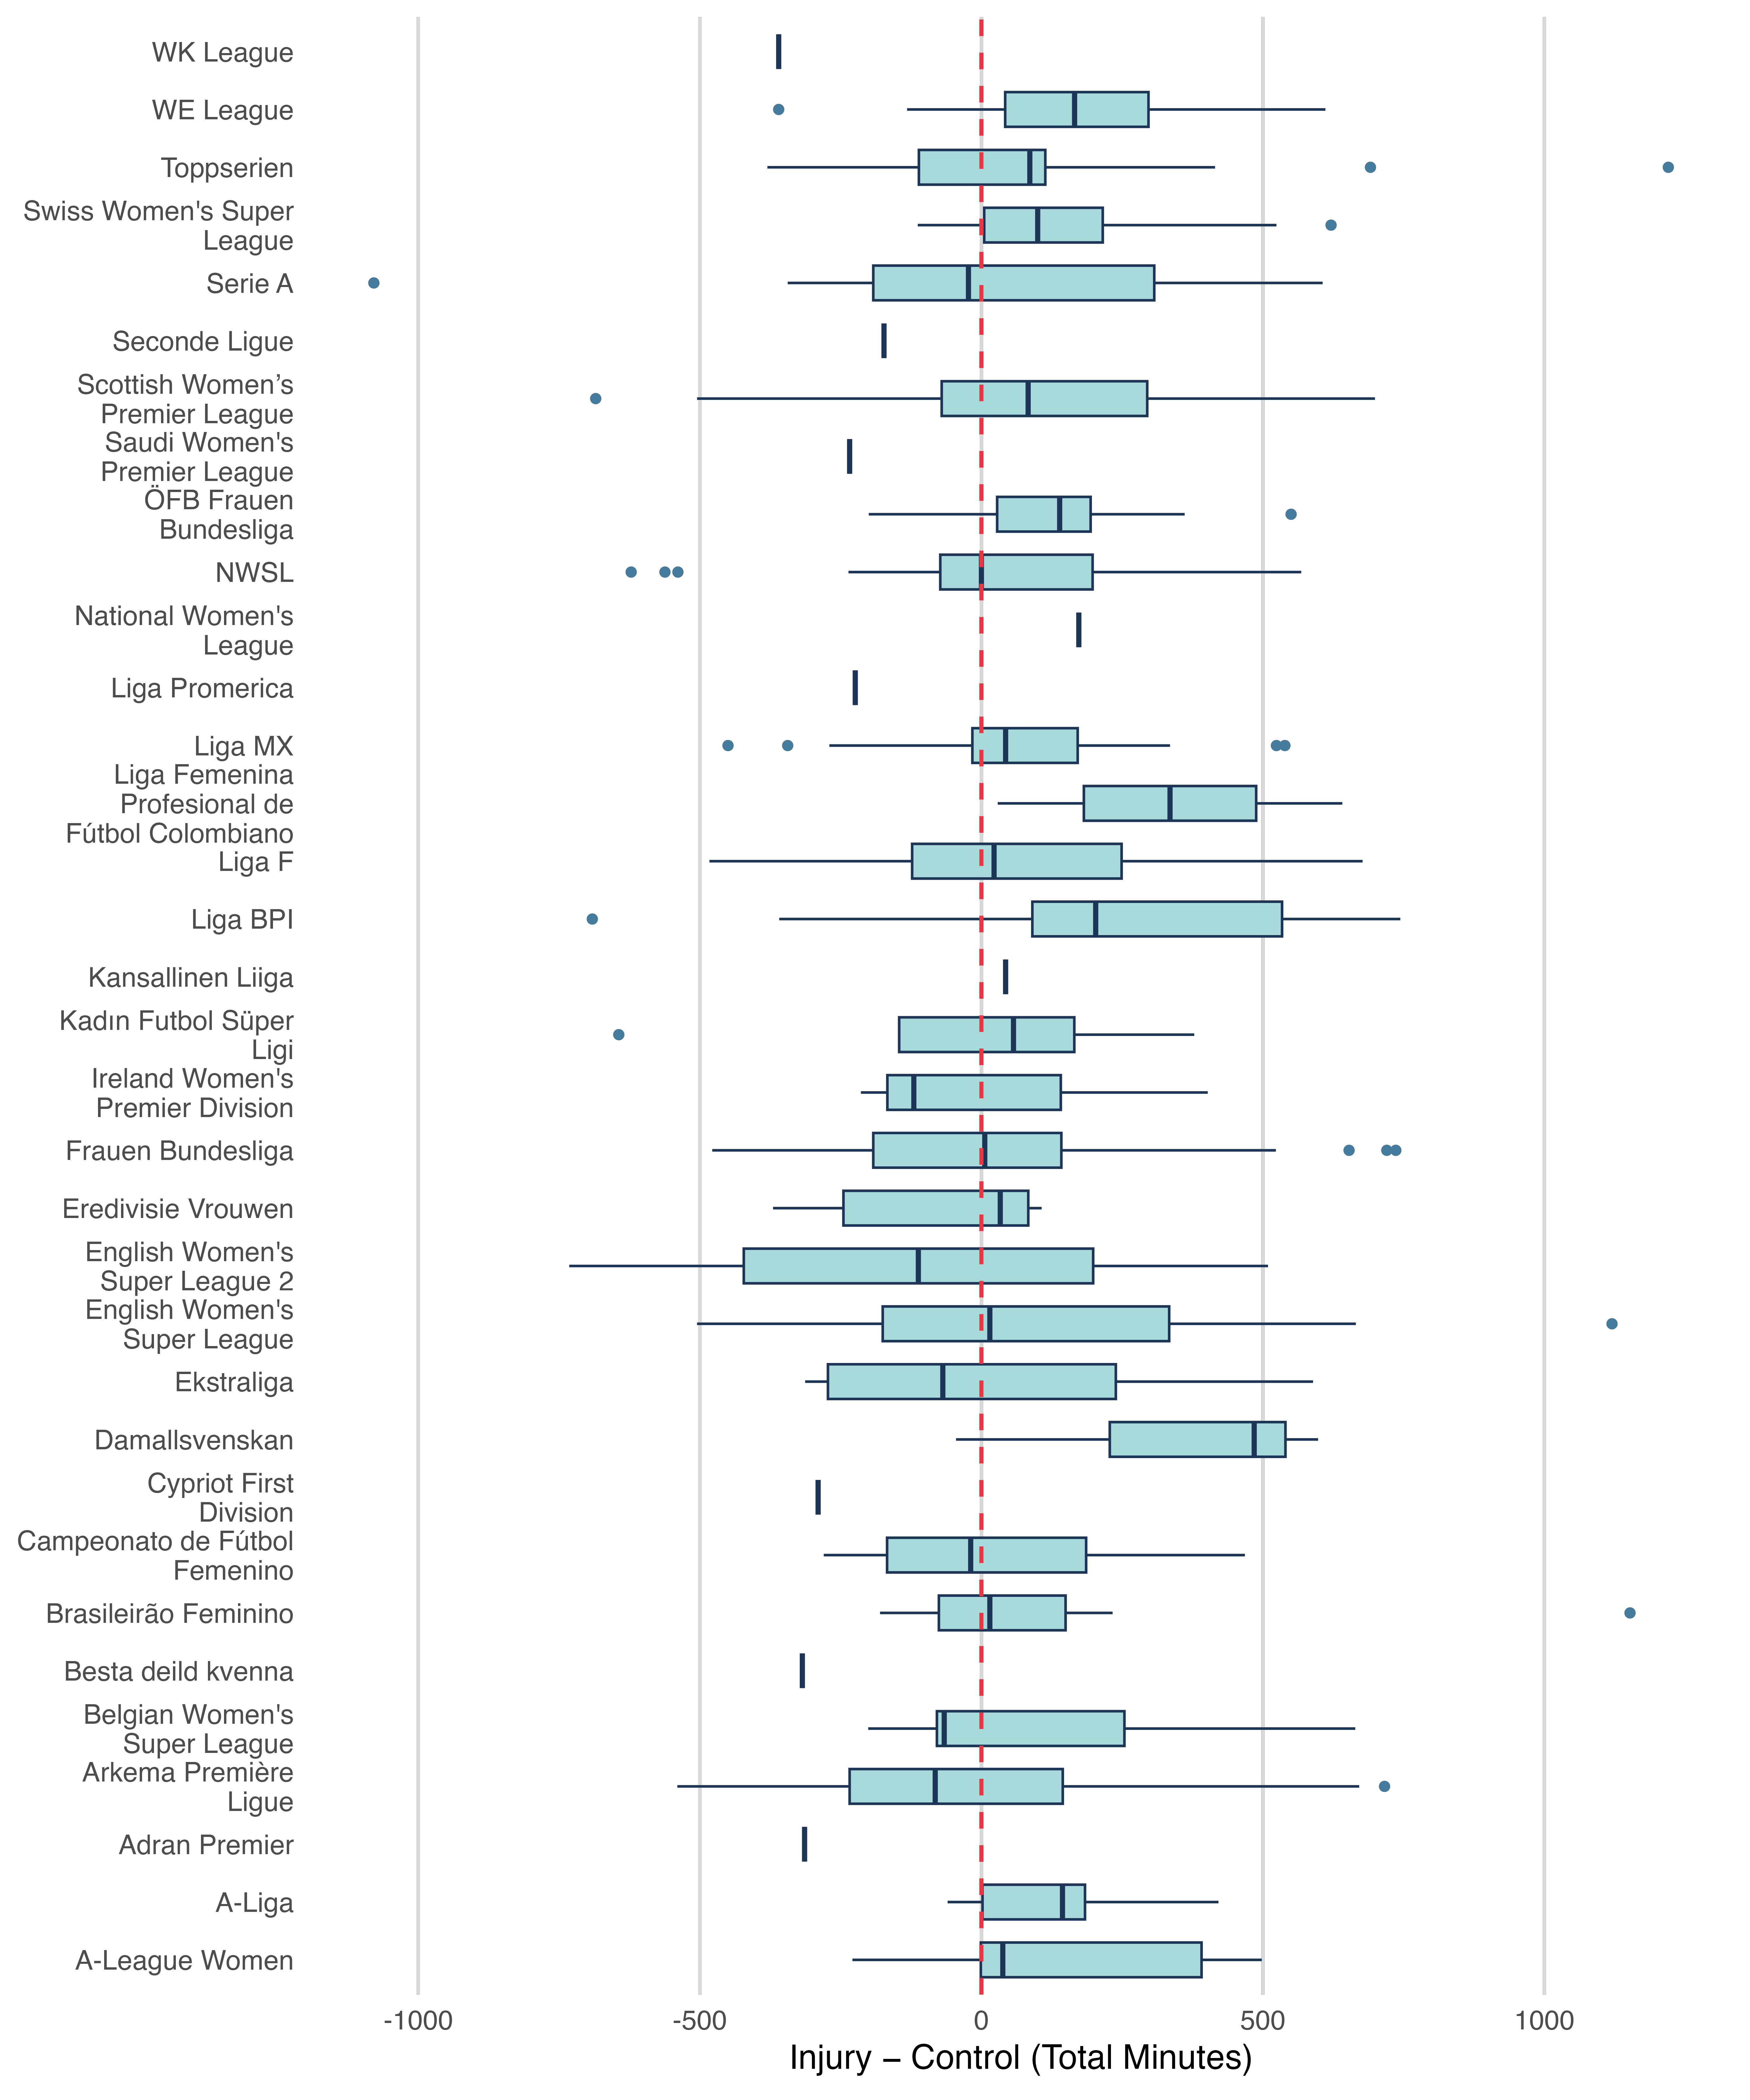


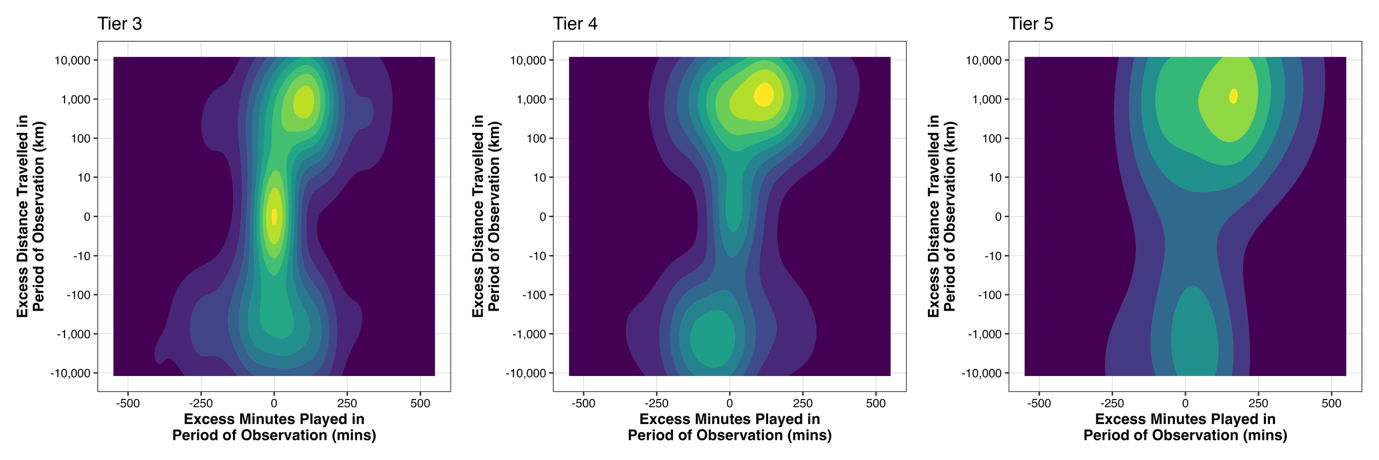

Supplement: Supplementary file 1 [file 72a02b4765ee27a68c45412b.docx]
